# Supplementary material
Source: publisher site journal article supplement (https://www.dovepress.com/get_supplementary_file.php?f=328451.docx)
Supplement: Supplementary file 1 [file get_supplementary_file.php]

**Table S1.** All OTUs annotations of each stool sample.

| Sample ID | Reads | 0.97 | | | | |
| --- | --- | --- | --- | --- | --- | --- |
| OTU | chao | coverage | Shannon | Simpson |
| A1 | 38401 | 174 | 252 | 0.998906 | 3.22 | 0.0704 |
| -208,352 | (3.21,3.23) | (0.0693,0.0715) |
| A10 | 45702 | 240 | 278 | 0.999059 | 3.7 | 0.0425 |
| -258,320 | (3.68,3.71) | (0.0419,0.0431) |
| A11 | 50804 | 387 | 448 | 0.998799 | 4.09 | 0.0345 |
| -419,504 | (4.08,4.1) | (0.0339,0.035) |
| A2 | 54581 | 245 | 312 | 0.998791 | 2.85 | 0.0948 |
| -281,370 | (2.83,2.86) | (0.0939,0.0958) |
| A3 | 50347 | 266 | 309 | 0.998987 | 3.59 | 0.0545 |
| -287,352 | (3.57,3.6) | (0.0537,0.0554) |
| A4 | 37355 | 250 | 295 | 0.998742 | 3.55 | 0.0576 |
| -272,344 | (3.54,3.57) | (0.0565,0.0587) |
| A5 | 42032 | 122 | 155 | 0.999215 | 2.42 | 0.192 |
| -136,200 | (2.41,2.44) | (0.1888,0.1952) |
| A6 | 58539 | 174 | 225 | 0.999368 | 2.78 | 0.1693 |
| -196,293 | (2.76,2.79) | (0.1665,0.1722) |
| A7 | 58068 | 301 | 351 | 0.999036 | 3.13 | 0.1161 |
| -326,398 | (3.11,3.15) | (0.1144,0.1178) |
| A8 | 48432 | 254 | 304 | 0.999071 | 3.75 | 0.0402 |
| -277,359 | (3.74,3.76) | (0.0397,0.0408) |
| A9 | 51035 | 330 | 355 | 0.999118 | 3.65 | 0.0603 |
| -342,383 | (3.63,3.66) | (0.0593,0.0612) |
| B1 | 54127 | 73 | 119 | 0.999594 | 2.53 | 0.1039 |
| -88,212 | (2.52,2.53) | (0.1031,0.1048) |
| B10 | 59322 | 212 | 247 | 0.999376 | 3.34 | 0.0669 |
| -227,291 | (3.33,3.36) | (0.066,0.0678) |
| B11 | 29889 | 207 | 256 | 0.998662 | 3.44 | 0.0605 |
| -229,316 | (3.42,3.46) | (0.0593,0.0616) |
| B12 | 52094 | 286 | 331 | 0.999098 | 3.9 | 0.0383 |
| -308,380 | (3.89,3.91) | (0.0378,0.0389) |
| B13 | 47623 | 124 | 202 | 0.99916 | 2.21 | 0.2639 |
| -157,306 | (2.19,2.22) | (0.2599,0.268) |
| B14 | 47119 | 170 | 201 | 0.999321 | 2.65 | 0.1761 |
| -183,244 | (2.63,2.66) | (0.173,0.1791) |
| B15 | 36360 | 152 | 188 | 0.999147 | 3.04 | 0.0868 |
| -167,240 | (3.02,3.05) | (0.0854,0.0883) |
| B16 | 54242 | 136 | 166 | 0.999318 | 2.72 | 0.1025 |
| -149,204 | (2.71,2.73) | (0.1011,0.1038) |
| B17 | 43237 | 198 | 267 | 0.998867 | 3.29 | 0.0684 |
| -231,343 | (3.27,3.3) | (0.0674,0.0695) |
| B18 | 54339 | 157 | 203 | 0.999356 | 2.41 | 0.2555 |
| -176,265 | (2.4,2.43) | (0.2516,0.2594) |
| B19 | 42329 | 191 | 219 | 0.999244 | 3.62 | 0.0416 |
| -203,257 | (3.61,3.64) | (0.0411,0.0422) |
| B2 | 45166 | 150 | 180 | 0.999424 | 2.91 | 0.1047 |
| -161,228 | (2.9,2.92) | (0.103,0.1064) |
| B20 | 54692 | 323 | 370 | 0.999177 | 3.9 | 0.037 |
| -345,423 | (3.89,3.91) | (0.0365,0.0375) |
| B3 | 35676 | 134 | 159 | 0.999243 | 2.69 | 0.1188 |
| -144,198 | (2.67,2.7) | (0.1171,0.1206) |
| B4 | 56790 | 130 | 150 | 0.99956 | 2.8 | 0.0972 |
| -138,183 | (2.79,2.81) | (0.0961,0.0982) |
| B5 | 36845 | 244 | 281 | 0.998914 | 3.79 | 0.0397 |
| -261,326 | (3.78,3.81) | (0.0391,0.0403) |
| B6 | 49164 | 129 | 180 | 0.999247 | 2.5 | 0.1637 |
| -151,248 | (2.48,2.51) | (0.1611,0.1663) |
| B7 | 51898 | 128 | 155 | 0.99946 | 2.87 | 0.0883 |
| -139,196 | (2.86,2.88) | (0.0872,0.0894) |
| B8 | 47706 | 126 | 177 | 0.999141 | 2.93 | 0.0811 |
| -149,239 | (2.92,2.94) | (0.0801,0.0822) |
| B9 | 44550 | 239 | 276 | 0.998967 | 3.72 | 0.049 |
| -257,316 | (3.71,3.74) | (0.048,0.0499) |

**Figure S1.** The microbial community distribution of the two groups at genus level.


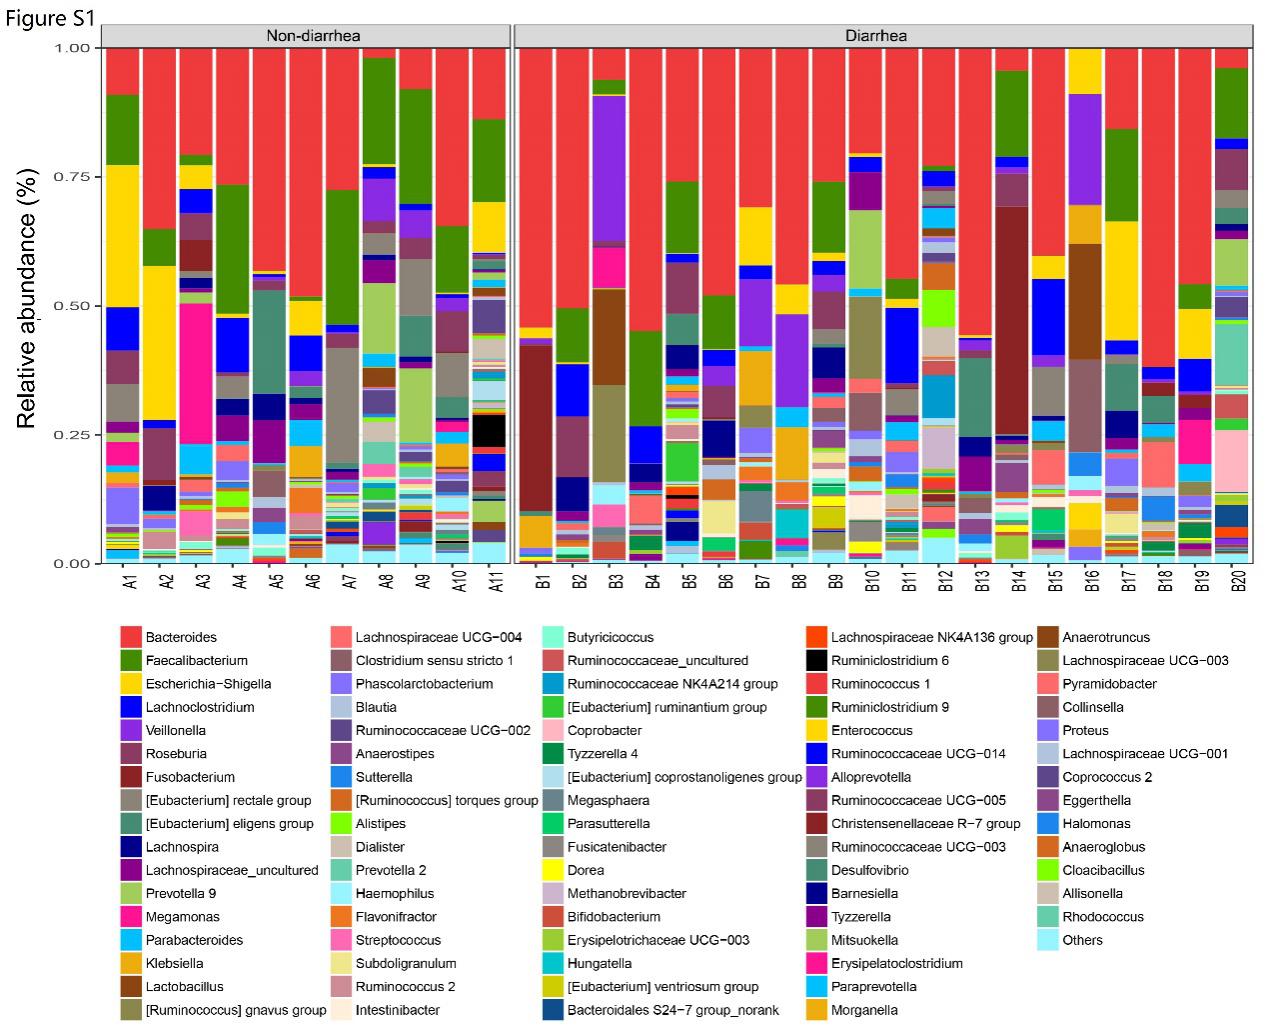


**Table S2.** The specific LDA score value of each bacterium.

| **Bacteria** | LDA SCORE (log 10) | Group | P value |
| --- | --- | --- | --- |
| Bacteria.Firmicutes.Bacilli.Lactobacillales.Streptococcaceae | 4.162408649 |  | - |
| Bacteria.Firmicutes.Clostridia.Clostridiales.Eubacteriaceae | 1.736272913 |  | - |
| Bacteria.Firmicutes.Clostridia.Clostridiales.Lachnospiraceae.Fusicatenibacter | 3.607905714 |  | - |
| Bacteria.Actinobacteria.Actinobacteria.Micrococcales.Micrococcaceae | 2.127479539 |  | - |
| Bacteria.Synergistetes.Synergistia.Synergistales.Synergistaceae.Cloacibacillus | 2.871935515 |  | - |
| Bacteria.Cyanobacteria.Oxyphotobacteria.Chloroplast | 1.259151658 |  | - |
| Bacteria.Firmicutes.Erysipelotrichia.Erysipelotrichales.Erysipelotrichaceae.Holdemania | 2.809850282 |  | - |
| Bacteria.Firmicutes.Clostridia.Clostridiales.Lachnospiraceae.Ruminococcus_gnavus_group | 4.279799741 |  | - |
| Bacteria.Bacteroidetes.Bacteroidia.Bacteroidales.Tannerellaceae | 4.181732342 | Diarrhea | 0.008627101 |
| Bacteria.Firmicutes.Clostridia.Clostridiales.Lachnospiraceae.Anaerostipes | 3.931675783 |  | - |
| Bacteria.Bacteroidetes.Bacteroidia.Bacteroidales.Prevotellaceae.Prevotella_7 | 2.703916876 |  | - |
| Bacteria.Firmicutes.Clostridia.Clostridiales.Lachnospiraceae.Lachnospiraceae_FCS020_group | 2.136434382 |  | - |
| Bacteria.Firmicutes.Erysipelotrichia.Erysipelotrichales.Erysipelotrichaceae.Erysipelatoclostridium | 2.995854541 |  | - |
| Bacteria.Proteobacteria.Gammaproteobacteria.Oceanospirillales.Halomonadaceae | 3.009719387 |  | - |
| Bacteria.Firmicutes.Clostridia.Clostridiales.Lachnospiraceae.Eisenbergiella | 1.650358284 |  | - |
| Bacteria.Firmicutes.Clostridia.Clostridiales.Family_XI | 0.923359556 |  | - |
| Bacteria.Firmicutes.Clostridia.Clostridiales.Peptostreptococcaceae | 3.782497854 |  | - |
| Bacteria.Proteobacteria.Gammaproteobacteria | 4.986918074 |  | - |
| Bacteria.Firmicutes.Erysipelotrichia | 3.726816672 |  | - |
| Bacteria.Verrucomicrobia | 3.281294403 |  | - |
| Bacteria.Proteobacteria.Alphaproteobacteria.Rhodospirillales | 1.768457596 |  | - |
| Bacteria.Firmicutes.Clostridia.Clostridiales.Ruminococcaceae.DTU089 | 2.224389552 |  | - |
| Bacteria.Fusobacteria.Fusobacteriia.Fusobacteriales | 4.181959454 | Non-diarrhea | 0.02961475 |
| Bacteria.Proteobacteria.Gammaproteobacteria.Betaproteobacteriales.Neisseriaceae.Eikenella | 1.701510807 |  | - |
| Bacteria.Firmicutes.Erysipelotrichia.Erysipelotrichales.Erysipelotrichaceae.Clostridium_innocuum_group | 2.93326257 | Diarrhea | 0.037022999 |
| Bacteria.Proteobacteria.Gammaproteobacteria.Enterobacteriales.Enterobacteriaceae.Escherichia_Shigella | 4.728996323 |  | - |
| Bacteria.Firmicutes.Negativicutes.Selenomonadales.Acidaminococcaceae.Phascolarctobacterium | 4.14689876 |  | - |
| Bacteria.Cyanobacteria.Melainabacteria | 1.186600991 |  | - |
| Bacteria.Bacteroidetes.Bacteroidia.Bacteroidales.Bacteroidaceae.Bacteroides | 5.570008301 |  | - |
| Bacteria.Firmicutes.Clostridia.Clostridiales.Lachnospiraceae.Howardella | 0.990306346 |  | - |
| Bacteria.Firmicutes.Bacilli.Lactobacillales.Aerococcaceae | 0.923359556 |  | - |
| Bacteria.Tenericutes.Mollicutes.Mollicutes_RF39 | 1.826449543 |  | - |
| Bacteria.Bacteroidetes | 5.626367045 |  | - |
| Bacteria.Firmicutes.Clostridia.Clostridiales.Ruminococcaceae.Ruminococcaceae_UCG_009 | 2.57657207 |  | - |
| Bacteria.Proteobacteria.Gammaproteobacteria.Enterobacteriales.Enterobacteriaceae.Citrobacter | 2.79842082 |  | - |
| Bacteria.Actinobacteria.Coriobacteriia.Coriobacteriales.Atopobiaceae.Olsenella | 1.400480811 |  | - |
| Bacteria.Firmicutes.Bacilli.Lactobacillales.Enterococcaceae.Enterococcus | 3.433457532 |  | - |
| Bacteria.Bacteroidetes.Bacteroidia | 5.626367045 |  | - |
| Bacteria.Proteobacteria.Gammaproteobacteria.Betaproteobacteriales.Burkholderiaceae.Ralstonia | 1.701510807 |  | - |
| Bacteria.Firmicutes.Clostridia.Clostridiales.Lachnospiraceae.Lachnoanaerobaculum | 1.525419548 |  | - |
| Bacteria.Firmicutes.Clostridia.Clostridiales.Ruminococcaceae.Papillibacter | 0.446238302 |  | - |
| Bacteria.Bacteroidetes.Bacteroidia.Bacteroidales.Rikenellaceae.Rikenella | 1.964752241 |  | - |
| Bacteria.Proteobacteria | 5.005570273 |  | - |
| Bacteria.Firmicutes.Clostridia.Clostridiales.Ruminococcaceae | 5.156787207 |  | - |
| Bacteria.Firmicutes.Clostridia.Clostridiales.Lachnospiraceae.Coprococcus_2 | 3.014440026 |  | - |
| Bacteria.Bacteroidetes.Bacteroidia.Bacteroidales.Bacteroidaceae | 5.570008301 |  | - |
| Bacteria.Firmicutes.Bacilli.Lactobacillales.Lactobacillaceae.Lactobacillus | 4.305556767 |  | - |
| Bacteria.Firmicutes.Clostridia.Clostridiales.Lachnospiraceae.Coprococcus_1 | 2.765344361 |  | - |
| Bacteria.Firmicutes.Clostridia.Clostridiales.Lachnospiraceae.Agathobacter | 4.342654278 |  | - |
| Bacteria.Firmicutes.Clostridia.Clostridiales.Ruminococcaceae.Eubacterium_coprostanoligenes_group | 3.562846046 |  | - |
| Bacteria.Firmicutes.Bacilli.Bacillales | 1.852778482 |  | - |
| Bacteria.Firmicutes.Erysipelotrichia.Erysipelotrichales | 3.726816672 |  | - |
| Bacteria.Bacteroidetes.Bacteroidia.Bacteroidales.Rikenellaceae.Rikenellaceae_RC9_gut_group | 2.162241645 |  | - |
| Bacteria.Verrucomicrobia.Verrucomicrobiae.Verrucomicrobiales.Akkermansiaceae | 3.281294403 |  | - |
| Bacteria.Firmicutes.Clostridia.Clostridiales.Family_XIII.Eubacterium_brachy_group | 1.048298293 |  | - |
| Bacteria.Proteobacteria.Deltaproteobacteria.Desulfovibrionales.Desulfovibrionaceae.Bilophila | 3.084727559 |  | - |
| Bacteria.Epsilonbacteraeota.Campylobacteria.Campylobacterales.Campylobacteraceae.Campylobacter | 2.037302909 |  | - |
| Bacteria.Firmicutes.Clostridia.Clostridiales.Lachnospiraceae.GCA_900066755 | 1.224389552 |  | - |
| Bacteria.Synergistetes.Synergistia.Synergistales | 3.277147601 |  | - |
| Bacteria.Firmicutes.Erysipelotrichia.Erysipelotrichales.Erysipelotrichaceae.Erysipelotrichaceae_UCG_003 | 3.453345685 |  | - |
| Bacteria.Firmicutes.Clostridia.Clostridiales.Ruminococcaceae.UBA1819 | 3.305376599 |  | - |
| Bacteria.Firmicutes.Clostridia.Clostridiales.Lachnospiraceae.Lachnospiraceae_NC2004_group | 1.375657227 |  | - |
| Bacteria.Firmicutes.Erysipelotrichia.Erysipelotrichales.Erysipelotrichaceae.Erysipelotrichaceae_UCG_006 | 1.467427601 |  | - |
| Bacteria.Proteobacteria.Gammaproteobacteria.Betaproteobacteriales.Burkholderiaceae | 4.084877289 |  | - |
| Bacteria.Firmicutes.Erysipelotrichia.Erysipelotrichales.Erysipelotrichaceae.Erysipelotrichaceae_UCG_004 | 0.145208306 |  | - |
| Bacteria.Proteobacteria.Gammaproteobacteria.Pasteurellales.Pasteurellaceae.Aggregatibacter | 1.984057397 |  | - |
| Bacteria.Epsilonbacteraeota | 2.037302909 |  | - |
| Bacteria.Firmicutes.Clostridia.Clostridiales.Lachnospiraceae.Eubacterium_hallii_group | 3.259151658 |  | - |
| Bacteria.Firmicutes.Clostridia.Clostridiales.Ruminococcaceae.Butyricicoccus | 3.612224124 |  | - |
| Bacteria.Firmicutes.Negativicutes.Selenomonadales.Veillonellaceae.Anaeroglobus | 3.681514178 |  | - |
| Bacteria.Verrucomicrobia.Verrucomicrobiae | 3.281294403 |  | - |
| Bacteria.Fusobacteria.Fusobacteriia | 4.180375144 | Non-diarrhea | 0.02961475 |
| Bacteria.Firmicutes.Clostridia.Clostridiales.Ruminococcaceae.Ruminococcus_1 | 3.403366499 |  | - |
| Bacteria.Firmicutes.Clostridia.Clostridiales.Lachnospiraceae.Lachnospiraceae_NK4A136_group | 3.12690407 | Non-diarrhea | 0.046485162 |
| Bacteria.Firmicutes.Negativicutes.Selenomonadales.Veillonellaceae.Megasphaera | 3.600662275 |  | - |
| Bacteria.Firmicutes.Clostridia.Clostridiales.Ruminococcaceae.Anaerotruncus | 2.991545418 |  | - |
| Bacteria.Proteobacteria.Gammaproteobacteria.Pasteurellales.Pasteurellaceae.Haemophilus | 3.831844575 |  | - |
| Bacteria.Firmicutes.Clostridia.Clostridiales.Lachnospiraceae.Lachnospira | 4.350141828 |  | - |
| Bacteria.Proteobacteria.Gammaproteobacteria.Pseudomonadales.Pseudomonadaceae.Pseudomonas | 2.069487592 |  | - |
| Bacteria.Firmicutes.Bacilli.Lactobacillales.Carnobacteriaceae | 2.29749665 |  | - |
| Bacteria.Proteobacteria.Gammaproteobacteria.Enterobacteriales | 4.920046312 |  | - |
| Bacteria.Proteobacteria.Gammaproteobacteria.Cardiobacteriales.Cardiobacteriaceae.Cardiobacterium | 1.224389552 |  | - |
| Bacteria.Proteobacteria.Gammaproteobacteria.Enterobacteriales.Enterobacteriaceae | 4.920046312 |  | - |
| Bacteria.Firmicutes.Clostridia.Clostridiales.Ruminococcaceae.Ruminococcaceae_V9D2013_group | 0.622329561 |  | - |
| Bacteria.Bacteroidetes.Bacteroidia.Bacteroidales.Muribaculaceae | 3.13510287 |  | - |
| Bacteria.Synergistetes.Synergistia.Synergistales.Synergistaceae | 3.277147601 |  | - |
| Bacteria.Firmicutes.Bacilli.Bacillales.Family_XI | 1.736272913 |  | - |
| Bacteria.Firmicutes.Clostridia.Clostridiales.Ruminococcaceae.Ruminococcus_2 | 4.012911439 |  | - |
| Bacteria.Firmicutes.Clostridia.Clostridiales.Ruminococcaceae.Candidatus_Soleaferrea | 1.835404386 |  | - |
| Bacteria.Firmicutes.Clostridia.Clostridiales.Family_XIII | 2.430765615 |  | - |
| Bacteria.Patescibacteria.Saccharimonadia.Saccharimonadales | 2.186600991 |  | - |
| Bacteria.Firmicutes.Negativicutes.Selenomonadales.Veillonellaceae.Selenomonas_4 | 0.446238302 |  | - |
| Bacteria.Actinobacteria.Coriobacteriia.Coriobacteriales.Coriobacteriaceae | 3.556828012 |  | - |
| Bacteria.Firmicutes.Clostridia.Clostridiales.Ruminococcaceae.Oscillospira | 2.153808478 |  | - |
| Bacteria.Actinobacteria.Coriobacteriia.Coriobacteriales.Atopobiaceae.Atopobium | 3.372085933 | Diarrhea | 0.01546024 |
| Bacteria.Firmicutes.Negativicutes.Selenomonadales.Veillonellaceae.Selenomonas_3 | 2.099450815 |  | - |
| Bacteria.Proteobacteria.Alphaproteobacteria.Rhizobiales | 2.099450815 |  | - |
| Bacteria.Firmicutes.Clostridia.Clostridiales.Ruminococcaceae.GCA_900066225 | 1.224389552 |  | - |
| Bacteria.Firmicutes.Clostridia.Clostridiales.Ruminococcaceae.Subdoligranulum | 3.81665886 |  | - |
| Bacteria.Firmicutes.Bacilli.Lactobacillales.Streptococcaceae.Streptococcus | 4.162158119 |  | - |
| Bacteria.Firmicutes.Clostridia.Clostridiales.Lachnospiraceae.GCA_900066575 | 1.701510807 |  | - |
| Bacteria.Proteobacteria.Deltaproteobacteria.Desulfovibrionales | 3.615324659 |  | - |
| Bacteria.Firmicutes.Clostridia.Clostridiales.Lachnospiraceae.Eubacterium_xylanophilum_group | 2.613555636 |  | - |
| Bacteria.Fusobacteria.Fusobacteriia.Fusobacteriales.Fusobacteriaceae.Fusobacterium | 4.17997804 | Non-diarrhea | 0.029480007 |
| Bacteria.Tenericutes.Mollicutes | 1.826449543 |  | - |
| Bacteria.Firmicutes.Clostridia.Clostridiales.Lachnospiraceae.Johnsonella | 1.224389552 |  | - |
| Bacteria.Proteobacteria.Gammaproteobacteria.Enterobacteriales.Enterobacteriaceae.Proteus | 3.304770854 | Non-diarrhea | 0.035386791 |
| Bacteria.Firmicutes.Erysipelotrichia.Erysipelotrichales.Erysipelotrichaceae.Holdemanella | 3.121354077 | Diarrhea | 0.04044247 |
| Bacteria.Bacteroidetes.Bacteroidia.Bacteroidales.Barnesiellaceae.Barnesiella | 3.221120067 |  | - |
| Bacteria.Firmicutes.Clostridia.Clostridiales.Lachnospiraceae.ASF356 | 1.923359556 |  | - |
| Bacteria.Firmicutes.Clostridia.Clostridiales.Ruminococcaceae.Anaerofilum | 1.400480811 |  | - |
| Bacteria.Firmicutes.Bacilli.Lactobacillales | 4.439211332 |  | - |
| Bacteria.Cyanobacteria | 1.525419548 |  | - |
| Bacteria.Firmicutes.Bacilli.Lactobacillales.Aerococcaceae.Abiotrophia | 0.923359556 |  | - |
| Bacteria.Firmicutes.Clostridia.Clostridiales.Lachnospiraceae.Lachnoclostridium | 4.652119032 |  | - |
| Bacteria.Firmicutes.Clostridia.Clostridiales.Christensenellaceae.Christensenellaceae_R_7_group | 3.055832711 |  | - |
| Bacteria.Bacteroidetes.Bacteroidia.Bacteroidales.Marinifilaceae.Odoribacter | 3.042285309 |  | - |
| Bacteria.Proteobacteria.Gammaproteobacteria.Pasteurellales.Pasteurellaceae.Actinobacillus | 2.037302909 |  | - |
| Bacteria.Firmicutes.Clostridia.Clostridiales.Lachnospiraceae.Eubacterium_ruminantium_group | 3.61942457 |  | - |
| Bacteria.Firmicutes.Clostridia.Clostridiales.Lachnospiraceae.Sellimonas | 3.179020245 | Diarrhea | 0.031001486 |
| Bacteria.Proteobacteria.Gammaproteobacteria.Enterobacteriales.Enterobacteriaceae.Morganella | 3.140404598 |  | - |
| Bacteria.Firmicutes.Clostridia.Clostridiales.Lachnospiraceae.Roseburia | 4.57084033 |  | - |
| Bacteria.Firmicutes.Bacilli.Bacillales.Family_XI.Gemella | 1.736272913 |  | - |
| Bacteria.Firmicutes.Clostridia.Clostridiales.Ruminococcaceae.Ruminococcaceae_NK4A214_group | 3.695925729 |  | - |
| Bacteria.Patescibacteria | 2.186600991 |  | - |
| Bacteria.Actinobacteria.Coriobacteriia.Coriobacteriales.Eggerthellaceae | 2.976438 |  | - |
| Bacteria.Actinobacteria.Actinobacteria | 3.555816849 |  | - |
| Bacteria.Firmicutes.Clostridia.Clostridiales.Clostridiaceae_1.Clostridium_sensu_stricto_1 | 4.20782789 |  | - |
| Bacteria.Epsilonbacteraeota.Campylobacteria.Campylobacterales.Campylobacteraceae | 2.037302909 |  | - |
| Bacteria.Firmicutes.Clostridia.Clostridiales.Ruminococcaceae.Faecalibacterium | 4.958495663 |  | - |
| Bacteria.Verrucomicrobia.Verrucomicrobiae.Verrucomicrobiales.Akkermansiaceae.Akkermansia | 3.281294403 |  | - |
| Bacteria.Firmicutes.Erysipelotrichia.Erysipelotrichales.Erysipelotrichaceae | 3.726816672 |  | - |
| Bacteria.Firmicutes.Erysipelotrichia.Erysipelotrichales.Erysipelotrichaceae.Turicibacter | 1.826449543 |  | - |
| Bacteria.Cyanobacteria.Melainabacteria.Gastranaerophilales | 1.186600991 |  | - |
| Bacteria.Firmicutes.Clostridia.Clostridiales.Lachnospiraceae.Eubacterium_ventriosum_group | 3.441434593 |  | - |
| Bacteria.Proteobacteria.Alphaproteobacteria.Rhizobiales.Beijerinckiaceae | 2.099450815 |  | - |
| Bacteria.Actinobacteria.Coriobacteriia.Coriobacteriales.Atopobiaceae | 3.200062817 | Diarrhea | 0.011366627 |
| Bacteria.Bacteroidetes.Bacteroidia.Bacteroidales.Prevotellaceae.Alloprevotella | 3.227993676 |  | - |
| Bacteria.Firmicutes.Clostridia.Clostridiales.Lachnospiraceae.Lachnospiraceae_UCG_008 | 2.202113157 |  | - |
| Bacteria.Firmicutes.Bacilli.Lactobacillales.Lactobacillaceae | 4.305556767 |  | - |
| Bacteria.Firmicutes.Clostridia.Clostridiales.Lachnospiraceae.Lachnospiraceae_ND3007_group | 2.916060318 |  | - |
| Bacteria.Firmicutes.Clostridia.Clostridiales.Lachnospiraceae.Lachnospiraceae_UCG_004 | 4.162158119 |  | - |
| Bacteria.Firmicutes.Clostridia.Clostridiales.Peptostreptococcaceae.Intestinibacter | 3.395140063 |  | - |
| Bacteria.Firmicutes.Clostridia.Clostridiales.Lachnospiraceae.Lachnospiraceae_UCG_001 | 2.793568317 |  | - |
| Bacteria.Firmicutes.Negativicutes.Selenomonadales.Acidaminococcaceae | 4.147374368 |  | - |
| Bacteria.Firmicutes.Clostridia.Clostridiales.Ruminococcaceae.Ruminococcaceae_UCG_005 | 3.248327559 |  | - |
| Bacteria.Firmicutes.Clostridia.Clostridiales.Ruminococcaceae.Ruminococcaceae_UCG_004 | 2.385757554 |  | - |
| Bacteria.Firmicutes.Clostridia.Clostridiales.Ruminococcaceae.Ruminococcaceae_UCG_007 | 0.145208306 |  | - |
| Bacteria.Bacteroidetes.Bacteroidia.Bacteroidales | 5.626367045 |  | - |
| Bacteria.Bacteroidetes.Bacteroidia.Bacteroidales.Rikenellaceae.Alistipes | 3.870629856 |  | - |
| Bacteria.Firmicutes.Clostridia.Clostridiales.Ruminococcaceae.Ruminococcaceae_UCG_003 | 3.226915576 |  | - |
| Bacteria.Firmicutes.Clostridia.Clostridiales.Ruminococcaceae.Ruminococcaceae_UCG_002 | 3.758415658 |  | - |
| Bacteria.Firmicutes.Clostridia.Clostridiales.Ruminococcaceae.Intestinimonas | 2.349328289 |  | - |
| Bacteria.Bacteroidetes.Bacteroidia.Bacteroidales.Prevotellaceae.Prevotella_9 | 4.125029736 |  | - |
| Bacteria.Firmicutes.Clostridia.Clostridiales.Ruminococcaceae.Oscillibacter | 2.679234412 |  | - |
| Bacteria.Fusobacteria.Fusobacteriia.Fusobacteriales.Fusobacteriaceae | 4.184128353 | Non-diarrhea | 0.029480007 |
| Bacteria.Epsilonbacteraeota.Campylobacteria | 2.037302909 |  | - |
| Bacteria.Firmicutes.Clostridia.Clostridiales.Lachnospiraceae.Eubacterium_fissicatena_group | 2.514424163 |  | - |
| Bacteria.Firmicutes.Clostridia.Clostridiales.Lachnospiraceae.CAG_56 | 2.4836648 |  | - |
| Bacteria.Proteobacteria.Gammaproteobacteria.Pseudomonadales.Pseudomonadaceae | 2.069487592 |  | - |
| Bacteria.Actinobacteria.Coriobacteriia.Coriobacteriales.Eggerthellaceae.Eggerthella | 2.976438 |  | - |
| Bacteria.Proteobacteria.Alphaproteobacteria.Sphingomonadales.Sphingomonadaceae | 1.048298293 |  | - |
| Bacteria.Fusobacteria | 4.182020816 | Non-diarrhea | 0.02961475 |
| Bacteria.Firmicutes.Clostridia | 5.624692919 |  | - |
| Bacteria.Proteobacteria.Gammaproteobacteria.Aeromonadales | 1.923359556 |  | - |
| Bacteria.Patescibacteria.Saccharimonadia.Saccharimonadales.Saccharimonadaceae | 2.059022158 |  | - |
| Bacteria.Firmicutes.Clostridia.Clostridiales.Ruminococcaceae.Ruminiclostridium | 0.446238302 |  | - |
| Bacteria.Firmicutes.Clostridia.Clostridiales.Christensenellaceae.Christensenella | 1.543148315 |  | - |
| Bacteria.Bacteroidetes.Bacteroidia.Bacteroidales.Marinifilaceae | 3.338332904 |  | - |
| Bacteria.Proteobacteria.Gammaproteobacteria.Betaproteobacteriales.Neisseriaceae.Neisseria | 1.826449543 |  | - |
| Bacteria.Proteobacteria.Gammaproteobacteria.Cardiobacteriales | 1.224389552 |  | - |
| Bacteria.Proteobacteria.Gammaproteobacteria.Pasteurellales.Pasteurellaceae | 3.840865066 |  | - |
| Bacteria.Firmicutes.Erysipelotrichia.Erysipelotrichales.Erysipelotrichaceae.Candidatus_Stoquefichus | 1.757992163 |  | - |
| Bacteria.Bacteroidetes.Bacteroidia.Bacteroidales.Barnesiellaceae | 3.240028686 |  | - |
| Bacteria.Actinobacteria.Coriobacteriia.Coriobacteriales.Coriobacteriales_Incertae_Sedis.Raoultibacter | 1.375657227 |  | - |
| Bacteria.Bacteroidetes.Bacteroidia.Bacteroidales.Porphyromonadaceae.Porphyromonas | 1.145208306 |  | - |
| Bacteria.Firmicutes.Negativicutes.Selenomonadales.Veillonellaceae.Veillonella | 4.559479534 |  | - |
| Bacteria.Proteobacteria.Gammaproteobacteria.Enterobacteriales.Enterobacteriaceae.Klebsiella | 4.44619487 |  | - |
| Bacteria.Bacteroidetes.Bacteroidia.Bacteroidales.Prevotellaceae.Prevotellaceae_NK3B31_group | 2.136434382 |  | - |
| Bacteria.Firmicutes.Clostridia.Clostridiales.Lachnospiraceae.Coprococcus_3 | 1.650358284 |  | - |
| Bacteria.Firmicutes.Clostridia.Clostridiales.Peptostreptococcaceae.Romboutsia | 3.388990222 |  | - |
| Bacteria.Firmicutes.Clostridia.Clostridiales.Peptococcaceae | 1.701510807 |  | - |
| Bacteria.Proteobacteria.Gammaproteobacteria.Betaproteobacteriales.Burkholderiaceae.Parasutterella | 3.603846155 |  | - |
| Bacteria.Actinobacteria.Actinobacteria.Actinomycetales.Actinomycetaceae.Actinomyces | 2.153808478 |  | - |
| Bacteria.Synergistetes | 3.277147601 |  | - |
| Bacteria.Firmicutes.Clostridia.Clostridiales.Clostridiaceae_1 | 4.20782789 |  | - |
| Bacteria.Firmicutes.Bacilli.Lactobacillales.Enterococcaceae | 3.433457532 |  | - |
| Bacteria.Firmicutes.Clostridia.Clostridiales.Family_XI.Ezakiella | 0.923359556 |  | - |
| Bacteria.Firmicutes.Clostridia.Clostridiales.Lachnospiraceae.Oribacterium | 2.127479539 |  | - |
| Bacteria.Actinobacteria.Actinobacteria.Micrococcales | 2.127479539 |  | - |
| Bacteria.Firmicutes.Erysipelotrichia.Erysipelotrichales.Erysipelotrichaceae.Coprobacillus | 1.525419548 |  | - |
| Bacteria.Actinobacteria.Actinobacteria.Bifidobacteriales.Bifidobacteriaceae | 3.536143413 |  | - |
| Bacteria.Bacteroidetes.Bacteroidia.Bacteroidales.Rikenellaceae | 3.879047307 |  | - |
| Bacteria.Firmicutes.Clostridia.Clostridiales.Lachnospiraceae.Hungatella | 3.108050987 |  | - |
| Bacteria.Firmicutes.Clostridia.Clostridiales.Lachnospiraceae.Blautia | 3.922562619 |  | - |
| Bacteria.Actinobacteria.Coriobacteriia.Coriobacteriales.Coriobacteriaceae.Collinsella | 3.556828012 |  | - |
| Bacteria.Firmicutes.Clostridia.Clostridiales.Lachnospiraceae.Tyzzerella_4 | 3.870793278 |  | - |
| Bacteria.Firmicutes.Clostridia.Clostridiales.Lachnospiraceae.Ruminococcus_gauvreauii_group | 2.439674532 |  | - |
| Bacteria.Bacteroidetes.Bacteroidia.Bacteroidales.Barnesiellaceae.Coprobacter | 1.869484176 |  | - |
| Bacteria.Fusobacteria.Fusobacteriia.Fusobacteriales.Leptotrichiaceae | 2.944875156 | Diarrhea | 0.026980703 |
| Bacteria.Firmicutes.Clostridia.Clostridiales.Lachnospiraceae | 5.4051174 |  | - |
| Bacteria.Proteobacteria.Gammaproteobacteria.Oceanospirillales.Halomonadaceae.Halomonas | 3.009719387 |  | - |
| Bacteria.Firmicutes.Clostridia.Clostridiales.Peptostreptococcaceae.Clostridioides | 3.173789673 | Non-diarrhea | 0.010423161 |
| Bacteria.Firmicutes.Negativicutes | 5.115703951 |  | - |
| Bacteria.Patescibacteria.Saccharimonadia | 2.186600991 |  | - |
| Bacteria.Firmicutes.Clostridia.Clostridiales.Ruminococcaceae.Angelakisella | 2.127479539 |  | - |
| Bacteria.Firmicutes.Clostridia.Clostridiales.Ruminococcaceae.Negativibacillus | 2.508820286 |  | - |
| Bacteria.Firmicutes.Clostridia.Clostridiales.Ruminococcaceae.Phocea | 1.525419548 |  | - |
| Bacteria.Bacteroidetes.Bacteroidia.Bacteroidales.Prevotellaceae.Prevotellaceae_UCG_004 | 2.365316394 |  | - |
| Bacteria.Proteobacteria.Gammaproteobacteria.Pasteurellales | 3.840865066 |  | - |
| Bacteria.Firmicutes.Bacilli | 4.440335391 |  | - |
| Bacteria.Proteobacteria.Gammaproteobacteria.Aeromonadales.Succinivibrionaceae.Succinatimonas | 1.923359556 |  | - |
| Bacteria.Firmicutes.Clostridia.Clostridiales.Lachnospiraceae.Tyzzerella | 3.137031239 | Diarrhea | 0.043704042 |
| Bacteria.Bacteroidetes.Bacteroidia.Bacteroidales.Tannerellaceae.Parabacteroides | 4.155372349 | Diarrhea | 0.008627101 |
| Bacteria.Firmicutes.Negativicutes.Selenomonadales.Veillonellaceae.Allisonella | 2.819150305 |  | - |
| Bacteria.Cyanobacteria.Oxyphotobacteria | 1.259151658 |  | - |
| Bacteria.Firmicutes.Clostridia.Clostridiales.Ruminococcaceae.Ruminococcaceae_UCG_013 | 2.970634424 |  | - |
| Bacteria.Firmicutes.Clostridia.Clostridiales.Ruminococcaceae.Ruminococcaceae_UCG_010 | 2.332729027 |  | - |
| Bacteria.Firmicutes.Clostridia.Clostridiales.Ruminococcaceae.Ruminococcaceae_UCG_011 | 0.747268297 |  | - |
| Bacteria.Bacteroidetes.Bacteroidia.Bacteroidales.Prevotellaceae.Prevotella_2 | 3.365316394 |  | - |
| Bacteria.Firmicutes.Clostridia.Clostridiales.Ruminococcaceae.Ruminococcaceae_UCG_014 | 3.402646873 |  | - |
| Bacteria.Actinobacteria.Coriobacteriia.Coriobacteriales.Eggerthellaceae.Cryptobacterium | 0.84417831 |  | - |
| Bacteria.Firmicutes.Bacilli.Bacillales.Bacillaceae.Bacillus | 1.224389552 |  | - |
| Bacteria.Actinobacteria.Actinobacteria.Actinomycetales.Actinomycetaceae | 2.153808478 |  | - |
| Bacteria.Proteobacteria.Alphaproteobacteria.Sphingomonadales | 1.048298293 |  | - |
| Bacteria.Firmicutes.Clostridia.Clostridiales.Family_XIII.Eubacterium_nodatum_group | 2.037302909 |  | - |
| Bacteria.Actinobacteria.Actinobacteria.Micrococcales.Micrococcaceae.Nesterenkonia | 1.622329561 |  | - |
| Bacteria.Actinobacteria.Actinobacteria.Bifidobacteriales | 3.536143413 |  | - |
| Bacteria.Actinobacteria.Actinobacteria.Micrococcales.Micrococcaceae.Rothia | 2.064286398 |  | - |
| Bacteria.Firmicutes.Clostridia.Clostridiales.Lachnospiraceae.Cellulosilyticum | 0.990306346 |  | - |
| Bacteria.Firmicutes.Erysipelotrichia.Erysipelotrichales.Erysipelotrichaceae.Faecalitalea | 2.285087392 |  | - |
| Bacteria.Bacteroidetes.Bacteroidia.Bacteroidales.Prevotellaceae | 4.295104513 |  | - |
| Bacteria.Tenericutes | 1.826449543 |  | - |
| Bacteria.Proteobacteria.Gammaproteobacteria.Pseudomonadales | 2.069487592 |  | - |
| Bacteria.Firmicutes.Clostridia.Clostridiales.Ruminococcaceae.Ruminiclostridium_9 | 3.448188243 |  | - |
| Bacteria.Firmicutes.Clostridia.Clostridiales.Ruminococcaceae.Ruminiclostridium_6 | 3.475622079 |  | - |
| Bacteria.Firmicutes.Clostridia.Clostridiales.Ruminococcaceae.Ruminiclostridium_5 | 2.769490402 |  | - |
| Bacteria.Verrucomicrobia.Verrucomicrobiae.Verrucomicrobiales | 3.281294403 |  | - |
| Bacteria.Proteobacteria.Deltaproteobacteria.Desulfovibrionales.Desulfovibrionaceae.Desulfovibrio | 3.463689031 |  | - |
| Bacteria.Firmicutes.Negativicutes.Selenomonadales.Veillonellaceae | 4.54690693 | Diarrhea | 0.03562425 |
| Bacteria.Firmicutes.Clostridia.Clostridiales.Lachnospiraceae.Tyzzerella_3 | 3.349870818 |  | - |
| Bacteria.Proteobacteria.Alphaproteobacteria | 2.14952968 |  | - |
| Bacteria.Firmicutes.Erysipelotrichia.Erysipelotrichales.Erysipelotrichaceae.Solobacterium | 1.525419548 |  | - |
| Bacteria.Proteobacteria.Gammaproteobacteria.Betaproteobacteriales | 4.087662832 |  | - |
| Bacteria.Synergistetes.Synergistia.Synergistales.Synergistaceae.Pyramidobacter | 3.060080123 |  | - |
| Bacteria.Firmicutes.Bacilli.Lactobacillales.Carnobacteriaceae.Carnobacterium | 0.84417831 |  | - |
| Bacteria.Proteobacteria.Gammaproteobacteria.Aeromonadales.Succinivibrionaceae | 1.923359556 |  | - |
| Bacteria.Proteobacteria.Gammaproteobacteria.Betaproteobacteriales.Burkholderiaceae.Oxalobacter | 1.467427601 |  | - |
| Bacteria.Firmicutes.Clostridia.Clostridiales.Ruminococcaceae.Flavonifractor | 4.18151775 |  | - |
| Bacteria.Firmicutes.Clostridia.Clostridiales.Lachnospiraceae.Ruminococcus_torques_group | 3.933730193 |  | - |
| Bacteria.Synergistetes.Synergistia | 3.277147601 |  | - |
| Bacteria.Firmicutes.Clostridia.Clostridiales.Eubacteriaceae.Eubacterium | 1.736272913 |  | - |
| Bacteria.Proteobacteria.Gammaproteobacteria.Oceanospirillales | 3.009719387 |  | - |
| Bacteria.Fusobacteria.Fusobacteriia.Fusobacteriales.Leptotrichiaceae.Leptotrichia | 2.948712198 | Diarrhea | 0.026980703 |
| Bacteria.Firmicutes.Clostridia.Clostridiales.Lachnospiraceae.Dorea | 3.525962077 |  | - |
| Bacteria.Firmicutes.Clostridia.Clostridiales | 5.624692919 |  | - |
| Bacteria.Firmicutes.Clostridia.Clostridiales.Family_XIII.Family_XIII_UCG_001 | 1.977717219 |  | - |
| Bacteria.Proteobacteria.Alphaproteobacteria.Sphingomonadales.Sphingomonadaceae.Sphingomonas | 1.048298293 |  | - |
| Bacteria.Firmicutes.Clostridia.Clostridiales.Christensenellaceae | 3.078189128 |  | - |
| Bacteria.Proteobacteria.Deltaproteobacteria | 3.615324659 |  | - |
| Bacteria.Proteobacteria.Gammaproteobacteria.Betaproteobacteriales.Burkholderiaceae.Sutterella | 3.907061 |  | - |
| Bacteria.Firmicutes.Clostridia.Clostridiales.Ruminococcaceae.CAG_352 | 0.747268297 |  | - |
| Bacteria.Proteobacteria.Alphaproteobacteria.Rhizobiales.Beijerinckiaceae.Methylobacterium | 2.069487592 |  | - |
| Bacteria.Firmicutes.Bacilli.Lactobacillales.Carnobacteriaceae.Granulicatella | 2.281928873 |  | - |
| Bacteria.Firmicutes.Clostridia.Clostridiales.Lachnospiraceae.Syntrophococcus | 0.84417831 |  | - |
| Bacteria.Firmicutes.Negativicutes.Selenomonadales.Veillonellaceae.Dialister | 3.874048874 |  | - |
| Bacteria.Epsilonbacteraeota.Campylobacteria.Campylobacterales | 2.037302909 |  | - |
| Bacteria.Proteobacteria.Gammaproteobacteria.Betaproteobacteriales.Neisseriaceae | 1.923359556 |  | - |
| Bacteria.Proteobacteria.Alphaproteobacteria.Rhizobiales.Beijerinckiaceae.Bosea | 0.923359556 |  | - |
| Bacteria.Actinobacteria.Coriobacteriia.Coriobacteriales | 3.664511155 |  | - |
| Bacteria.Actinobacteria.Coriobacteriia | 3.664511155 |  | - |
| Bacteria.Firmicutes.Clostridia.Clostridiales.Lachnospiraceae.Eubacterium_eligens_group | 4.418811383 |  | - |
| Bacteria.Firmicutes.Negativicutes.Selenomonadales.Acidaminococcaceae.Acidaminococcus | 1.525419548 |  | - |
| Bacteria.Firmicutes.Bacilli.Lactobacillales.Streptococcaceae.Lactococcus | 1.736272913 |  | - |
| Bacteria.Actinobacteria.Actinobacteria.Bifidobacteriales.Bifidobacteriaceae.Bifidobacterium | 3.536143413 |  | - |
| Bacteria.Firmicutes.Clostridia.Clostridiales.Lachnospiraceae.Marvinbryantia | 3.335490762 | Diarrhea | 0.039370119 |
| Bacteria.Bacteroidetes.Bacteroidia.Bacteroidales.Prevotellaceae.Prevotella | 2.079706757 |  | - |
| Bacteria.Firmicutes.Negativicutes.Selenomonadales.Veillonellaceae.Selenomonas | 1.525419548 |  | - |
| Bacteria.Firmicutes.Negativicutes.Selenomonadales.Veillonellaceae.Megamonas | 4.583008673 | Diarrhea | 0.009509281 |
| Bacteria.Firmicutes | 5.718548786 |  | - |
| Bacteria.Bacteroidetes.Bacteroidia.Bacteroidales.Prevotellaceae.Paraprevotella | 3.068970267 |  | - |
| Bacteria.Firmicutes.Erysipelotrichia.Erysipelotrichales.Erysipelotrichaceae.Dielma | 1.701510807 |  | - |
| Bacteria.Firmicutes.Clostridia.Clostridiales.Ruminococcaceae.Acetanaerobacterium | 0.84417831 |  | - |
| Bacteria.Actinobacteria.Actinobacteria.Actinomycetales | 2.153808478 |  | - |
| Bacteria.Bacteroidetes.Bacteroidia.Bacteroidales.Marinifilaceae.Butyricimonas | 3.032262684 |  | - |
| Bacteria.Proteobacteria.Gammaproteobacteria.Cardiobacteriales.Cardiobacteriaceae | 1.224389552 |  | - |
| Bacteria.Firmicutes.Clostridia.Clostridiales.Family_XIII.Family_XIII_AD3011_group | 1.835404386 |  | - |
| Bacteria.Firmicutes.Bacilli.Bacillales.Bacillaceae | 1.224389552 |  | - |
| Bacteria.Firmicutes.Clostridia.Clostridiales.Peptococcaceae.Peptococcus | 1.701510807 |  | - |
| Bacteria.Actinobacteria.Coriobacteriia.Coriobacteriales.Eggerthellaceae.Gordonibacter | 1.145208306 |  | - |
| Bacteria.Bacteroidetes.Bacteroidia.Bacteroidales.Porphyromonadaceae | 1.145208306 |  | - |
| Bacteria.Firmicutes.Negativicutes.Selenomonadales | 5.115703951 |  | - |
| Bacteria.Firmicutes.Negativicutes.Selenomonadales.Veillonellaceae.Mitsuokella | 3.230141881 |  | - |
| Bacteria.Bacteroidetes.Bacteroidia.Bacteroidales.Prevotellaceae.Prevotella_6 | 3.385380235 | Diarrhea | 0.026980703 |
| Bacteria.Firmicutes.Clostridia.Clostridiales.Lachnospiraceae.Lachnospiraceae_UCG_003 | 3.145208306 |  | - |
| Bacteria.Firmicutes.Clostridia.Clostridiales.Peptostreptococcaceae.Peptostreptococcus | 0.923359556 |  | - |
| Bacteria.Firmicutes.Clostridia.Clostridiales.Clostridiales_vadinBB60_group | 1.186600991 |  | - |
| Bacteria.Proteobacteria.Deltaproteobacteria.Desulfovibrionales.Desulfovibrionaceae | 3.615324659 |  | - |
| Bacteria | 6 |  | - |
| Bacteria.Actinobacteria | 3.751374621 |  | - |
